# Supplementary material
Source: MDPI journal article supplement (https://www.mdpi.com/2073-4395/10/6/782)
Supplement: s1 [file s1]

a)

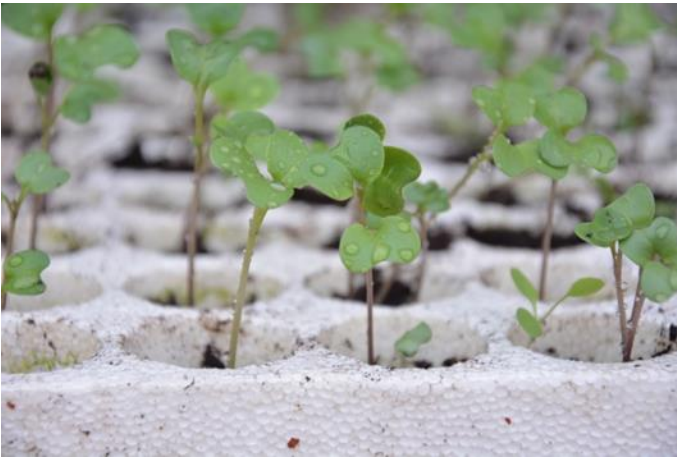

b)

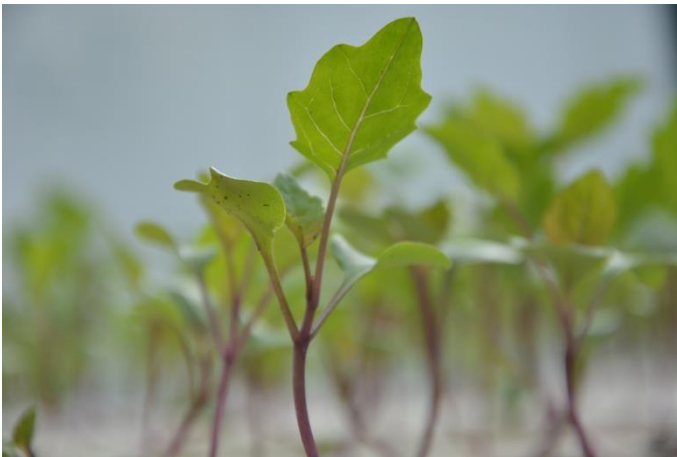

c)

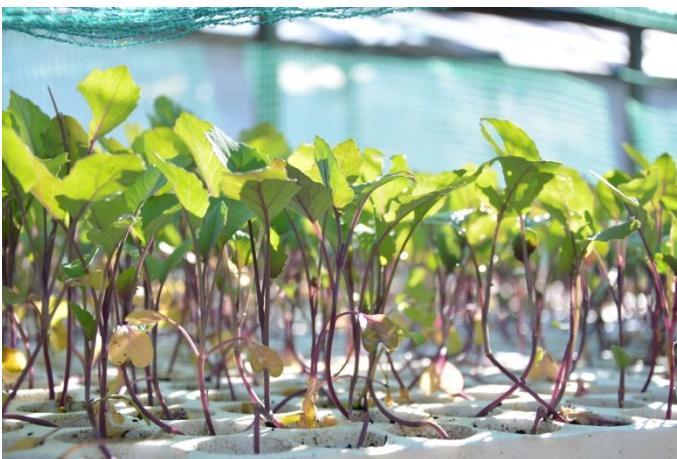

**Figure S1.** Details of BN sprouts (a), microgreens (b) and baby leaves (c). Seeds were sown in cellular trays placed in cold the cold greenhouse from November to December 2017. Plants were collected at the three plant growth stages analyzed: sprouts (germinated seeds without coats and roots), microgreens (plantlets with the first true leaf) and baby leaves (plantlets with almost three true leaves).
